# Supplementary material for: Determinants of the Green Growth Index in Countries Around the World by Bayesian Belief Network Model
Source: Research Square preprint supplement (doi:10.21203/rs.3.rs-7675836/v1), 2025-11-06
Supplement: Supplementary file 1 [file 8d2bb528331816b2956f78d6.docx]

Appendix 1: Variable description

| **Variables** | **Categorisation** | **Description** | **States of variables in a Bayesian network** | **Discretisation method** | **Expectation** | **Source of discretization method** |
| --- | --- | --- | --- | --- | --- | --- |
| **Dependent variables** | | | | |  |  |
| GGI | Countinuos | Green Growth Index | 1= Very low (1-20) 2= Low (21-40) 3= Medium (41-60) 4= High (61-80)  5= Very high (81-100) | Benchmark |  | Global Green Growth Institute (GGGI) |
| **Independent variables** | | | | |  |  |
| ***Economic factors*** | | | | |  |  |
| GDP Growth | Continuous | Annual GDP Growth (%) | 1= Low (<=2.5%)  2= Moderate (2.5% - 5%)  3= High (>5%) | Data statistics | (+) |  |
| Unemployment | Continuous | Unemployment rate (% of the total labour force). | 1= Low (<=5%)  2= Moderate (5% -10%)  3= High (>10%) | Data statistics | (-) |  |
| ***Energy-related factors*** | | | | | |  |
| Primary Energy Consumption | Continuous | Primary energy consumption (TWh) | 1= Low (<=500 Twh)  2= High (>500 TWh ) | Data statistics | (-) |  |
| Annual CO₂ Emissions | Continuous | Carbon dioxide emissions (tonnes of CO2) | 1= Low (<= 10,000,000 tons)  2= Average (10,000,001-100,000,000 tons)  3= High (>100,000,000 tons) | Data statistics | (-) |  |
| Forest Area | Continuous | Forest area (Percent of land area (%)) | 1= Low (<=21.43%)  2= Average (21.43% -37.63%)  3= High (>37.63%) | Data statistics | (+) |  |
| ***Institutional Quality*** | |  |  |  |  |  |
| WGI | Continuous | World Governance Index | 1= Weak (-2.5 - 0)  2= Strong (0-2.5) | Benchmark | (+) | [Tawiah et al (2021)](#_ENREF_90), [Sofik Handoyo (2023)](#_ENREF_38) |
| ***Internationalisation factors*** | |  |  |  |  |  |
| Global Innovation | Continuous | The Global Innovation Index (1-100 scale) | 1= Low (0-25)  2= Moderate (26 - 43)  3= High (>43) | Benchmark | (+) | Cornell, INSEAD, and WIPO |
| Trade Openness | Continuous | Trade openness (% of GDP) | 1= Low (<= 48.5)  2= Moderate (48.5 - 86.5)  3= High (> 86.5) | Data statistics | (+) |  |
| FDI | Continuous | Foreign direct investment as a percentage of GDP | 1= Low (<= 0)  2= Moderate (0 - 5)  3= High (>5) | Benchmark | (+) | Our World Bank Data |
| ***Control factors*** | | |  |  |  |  |
| HDI | Continuous | Human Development Index | 1= Low  2= Moderate  3= High  4= Very High | Benchmark | (+) | United Nations Development Programme |
| Population Growth | Continuous | Annual population growth rate (%). | 1= Low (<=1%)  2= Moderate (1% - 2%)  3= High (>2%) | Data statistics | (-) |  |
| Education Expenditure | Continuous | Government spending on education (% of GDP) | 1= Low (<=4%)  2= High (>4%) | Data statistics | (+) |  |
| Natural Resources Rent | Continuous | Total natural resources rents | 1= Low (<=1.1%)  2= High (>1.1%) | Data statistics | (-) |  |
| Country Classification | Discrete | WESP categorises all countries worldwide into three primary groups: developing countries, developed countries, and economies in transition. | 1= Developed countries  2= Developing countries and Economies in transition | Benchmark | (-) | [World Economic Situation and Prospects (WESP) (2023)](#_ENREF_1) |

Appendix 2: Identify differences between two groups of groups (developed countries vs. developing countries & transition economies)

| **Parameters** | **Country Classification** | | | | | **Sig. value for t-test (2- tailed)** |
| --- | --- | --- | --- | --- | --- | --- |
| **Developed Countries** | | **Developing Countries and Economies in Transition** | | |
| **Mean** | **Std. Deviation** | **Mean** | **Std. Deviation** | |
| **Green Growth Index** | **66.73** | **6.55** | **50.93** | **8.50** | | **0.000***** |
| **Economic Factors** | | | | |  | |
| GDP Growth (%) | 1.47 | 4.97 | 1.60 | 6.16 | | 0.843NS |
| Unemployment (%) | 6.25 | 2.91 | 7.18 | 5.02 | | 0.048** |
| **Energy-related Factors** | | | | |  | |
| Primary Energy Consumption (TWh) | 1,535.6 | 4,438.2 | 1,300.2 | 5,387.7 | | 0.710NS |
| Annual CO2 Emissions (tonnes) | 297,989,302.7 | 868,410,784.9 | 309,687,303.9 | 1,415,230,202.7 | | 0.940NS |
| Forest Area (%) | 34.42 | 17.30 | 29.98 | 19.03 | | 0.048** |
| **Institutional Quality Factor** | | | | |  | |
| World Governance Index | 1.08 | 0.57 | -0.58 | 0.63 | | 0.000*** |
| **Internationalization Factor** | | | | |  | |
| Trade Openness (% GDP) | 109.15 | 67.38 | 67.04 | 31.03 | | 0.000*** |
| Global Innovation Index (1-100 points) | 49 | 8 | 30 | 8 | | 0.000*** |
| Foreign Direct Investment (% GDP) | 6.05 | 37.32 | 2.83 | 3.35 | | 0.394NS |
| **Control Factors** | | | | |  | |
| Education Expenditure (% GDP) | 5.17 | 1.16 | 4.16 | 1.40 | | 0.000*** |
| Population growth (%) | 0.30 | 0.83 | 1.09 | 1.19 | | 0.000*** |
| Natural Resources rents (% GDP) | 0.89 | 1.99 | 4.93 | 6.89 | | 0.000*** |
| HDI | 0.91 | 0.04 | 0.71 | 0.11 | | 0.000*** |
| Note: ***Sig.<0.01, **Sig.<0.05, *Sig < 0.10 (2-tailed), NS: Not Significant | | | | | | |
